# Supplementary material
Source: PubMed Central journal article supplement (PMC10517330)
Supplement: Supp_FigS1.pdf [file Supp_FigS1.pdf]

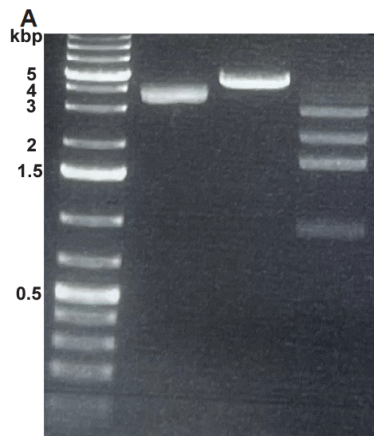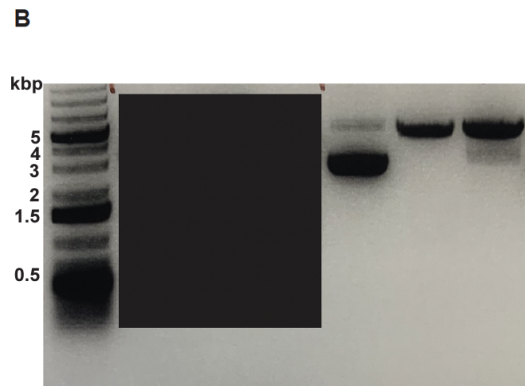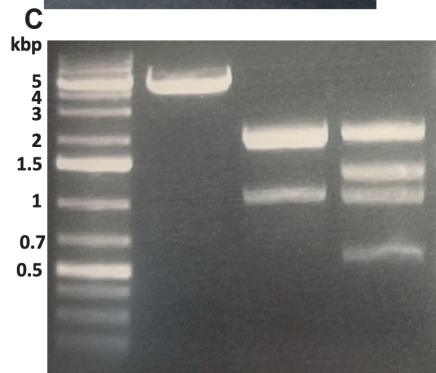

**Supplementary Figure 1:** Restriction enzyme digest of the ITRs in A. +ZF-FKBP plasmid, B. -ZF-FKBP plasmid, and C. +ZF-FKBP\_GFP plasmid before packaging into AAV. A. Ladder, uncut plasmid, cut plasmid (XbaI), and ITR digest (XmaI; 2892 bp, 2267 bp, 1245 bp). B. Ladder, uncut plasmid, cut plasmid (XbaI), and ITR digest (XmaI; 2892 bp, 2493bp). C. Ladder, cut plasmid (NotI), ITR digest with single enzyme (XmaI; 2681 bp, 2478bp, 1369 bp) and ITR digest with two enzymes (XmaI and HindIII; 2681 bp, 1722 bp, 756 bp).
