# Supplementary material
Source: PubMed Central journal article supplement (PMC10517330)
Supplement: Supp_FigS2.pdf [file Supp_FigS2.pdf]

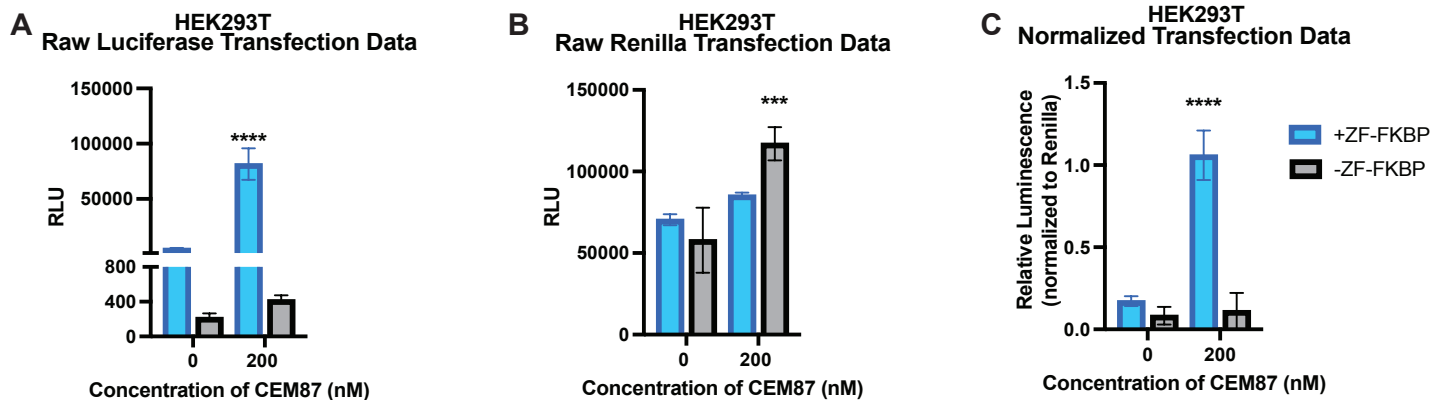

**Supplementary Figure 2:** Data from transfection of plasmids containing either +ZF-FKBP or -ZF-FKBP into HEK293T EF1 $\alpha$ -Renilla cells. A. Raw firefly luciferase data, B. Raw renilla luciferase data, and C. Relative firefly luciferase luminescence data normalized to renilla luciferase data.
