# Supplementary material
Source: PubMed Central journal article supplement (PMC10517330)
Supplement: Supp_FigS3.pdf [file Supp_FigS3.pdf]

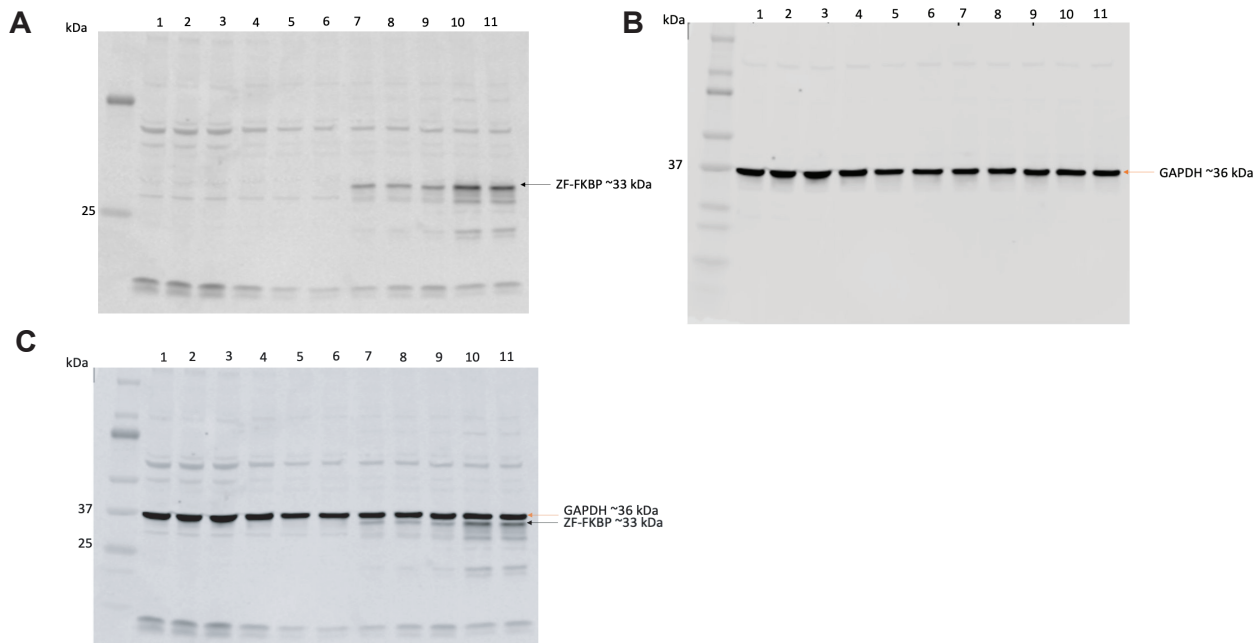

**Supplementary Figure 3:** Western Blot of HEK293T EF1 $\alpha$ -Renilla cells transduced or transfected with +ZF-FKBP then treated with CEM87. The presence of ZF-FKBP was detected with Rabbit polyclonal anti-FKBP (ABCAM; ab2918). The presence of GAPDH was detected with Mouse monoclonal anti-GAPDH (ABCAM; ab8245). Lanes 1-3: AAV2 +ZF-FKBP and 0 nM CEM87; Lanes 4-6 AAV2 +ZF-FKBP and 200 nM CEM87; Lanes 7-9 Plasmid +ZF-FKBP and 0 nM CEM87; Lanes 10-11 Plasmid +ZF-FKBP and 200 nM CEM87. Orange arrow indicates GAPDH at 36 kDa. Black arrow indicates ZF-FKBP at 33 kDa. A. Blot imaged with 700 channel to visualize Rabbit polyclonal anti-FKBP B. Blot imaged with 800 channel to visualize Mouse monoclonal anti-GAPDH. C. Merge of both blots in Supplemental Figure 2A and 2B.
