# Supplementary material
Source: PubMed Central journal article supplement (PMC10517330)
Supplement: Supp_FigS5.pdf [file Supp_FigS5.pdf]

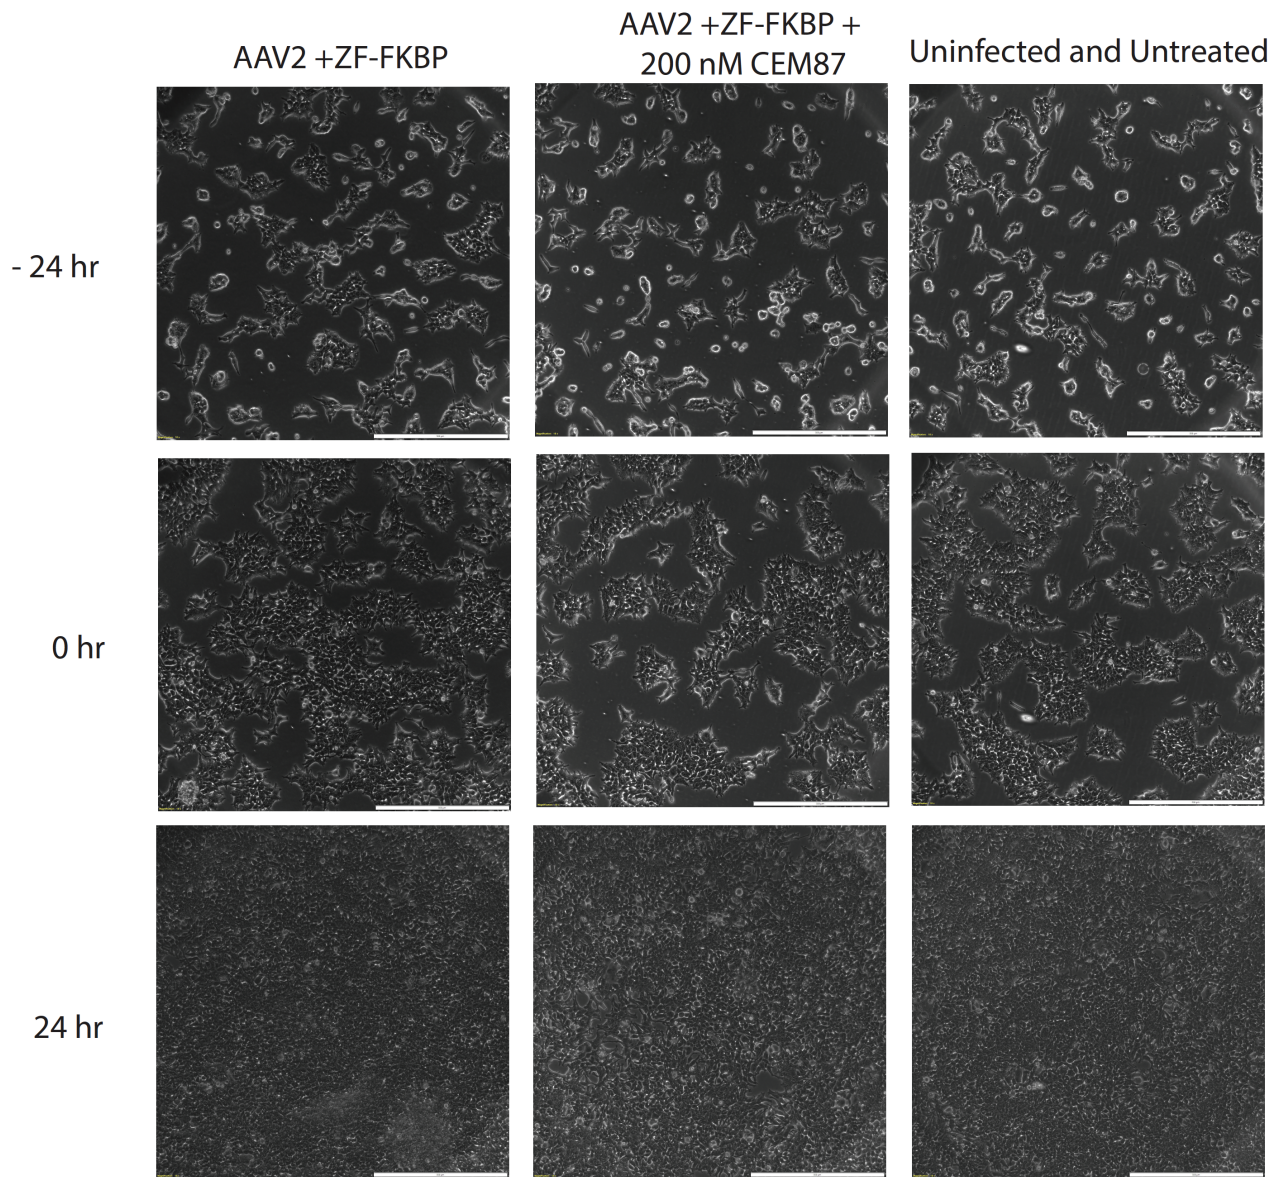

**Supplementary Figure 5:** Microscope images of HEK293T EF1 $\alpha$ -Renilla cells that were either infected with AAV2 +ZF-FKBP, infected with AAV2 +ZF-FKBP and treated with 200 nM CEM87, or left uninfected and untreated. Phase images were taken 24 hours before CEM87 Treatment (-24 hr), at the time of CEM87 Treatment (0 hr), and 24 hours after CEM87 Treatment (24 hr). Images were taken at 10X magnification and the scale bar represents 500  $\mu$ m.
