# Supplementary material
Source: PubMed Central journal article supplement (PMC10517330)
Supplement: Supp_FigS6.pdf [file Supp_FigS6.pdf]

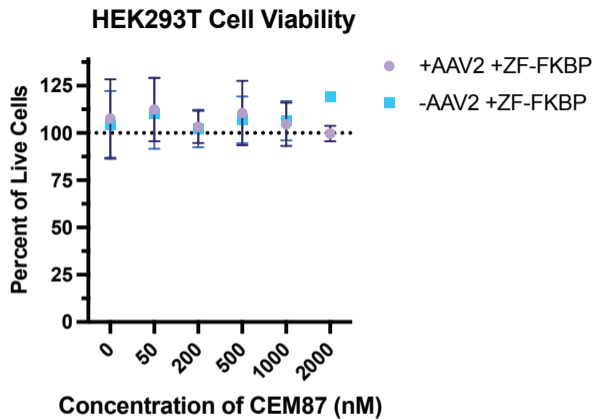

**Supplementary Figure 6:** Data from HEK293T cells either infected with  $2E+4$  vg/cell of AAV2 containing +ZF-FKBP or no AAV2 and treated with 0 to 2000 nM of CEM87.
