# Supplementary material
Source: PubMed Central journal article supplement (PMC10517330)
Supplement: Supp_FigS7.pdf [file Supp_FigS7.pdf]

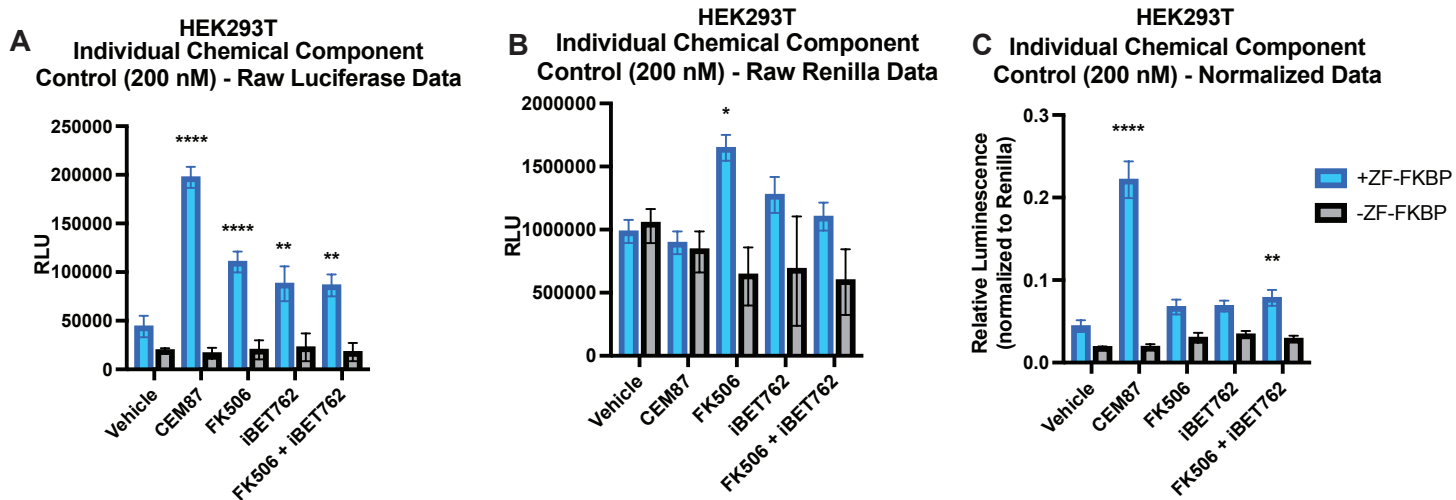

**Supplementary Figure 7:** Data from infection of 2E+4 AAV2 containing +ZF-FKBP or -ZF-FKBP and treatment with either 200 nM CEM87 or its individual chemical components into HEK293T EF1 $\alpha$ -Renilla cells. A. Raw firefly luciferase data, B. Raw renilla luciferase data, and C. Relative firefly luciferase luminescence data normalized to renilla luciferase data.
