# Supplementary material
Source: PubMed Central journal article supplement (PMC10517330)
Supplement: Supp_FigS10.pdf [file Supp_FigS10.pdf]

**A**

**U2OS**  
Dose Curve of CEM87 Raw Luciferase Data  
2E+4 vg/cell

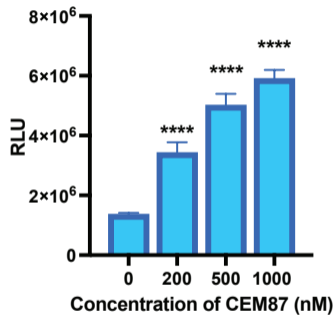**B**

**U2OS**  
Dose Curve of CEM87 Raw Renilla Data  
2E+4 vg/cell

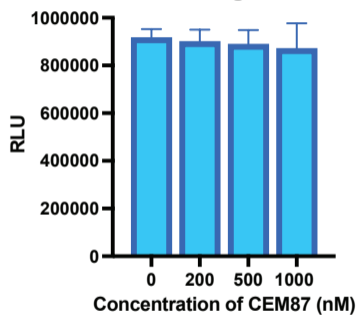**C**

**U2OS**  
Dose Curve of CEM87 Normalized Data  
2E+4 vg/cell

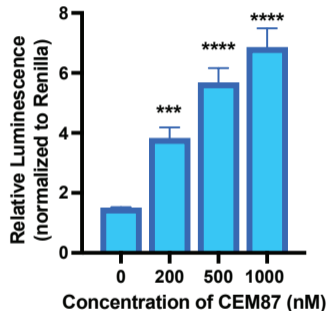

**Supplementary Figure 10:** Data from infection of 2E+4 vg/cell of AAV2 containing +ZF-FKBP and varying concentrations of CEM87 into U2-OS EF1 $\alpha$ -Renilla cells. A. Raw firefly luciferase data, B. Raw renilla luciferase data, and C. Relative firefly luciferase luminescence data normalized to renilla luciferase data.
