# Supplementary material
Source: PubMed Central journal article supplement (PMC10517330)
Supplement: Supp_FigS11.pdf [file Supp_FigS11.pdf]

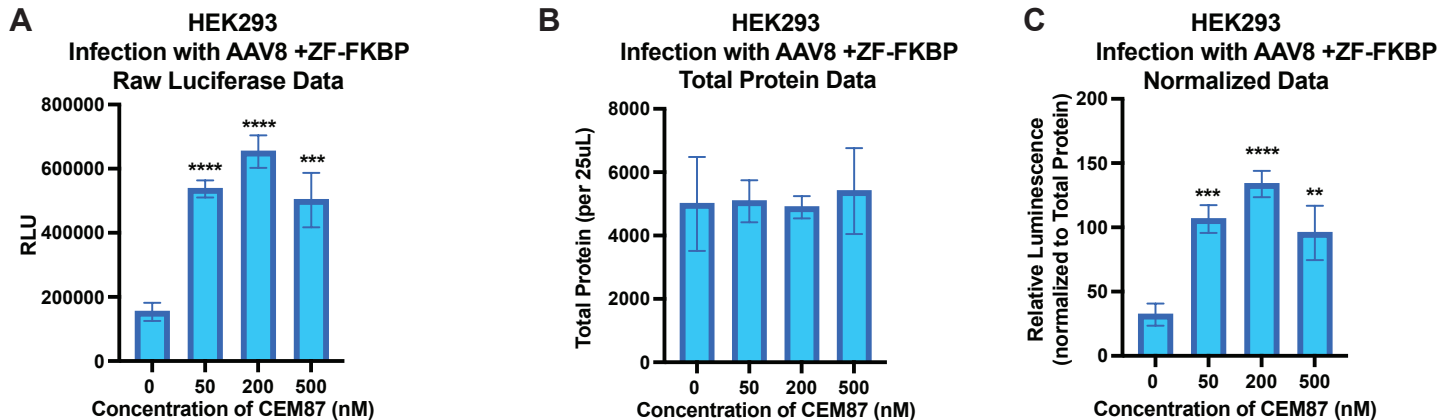

**Supplementary Figure 11:** Data from infection of  $2E+4$  vg/cell of AAV8 containing +ZF-FKBP and varying concentrations of CEM87 into HEK293 cells that have been transfected with a plasmid encoding E4orf6. A. Raw firefly luciferase data, B. Total protein data, and C. Relative firefly luciferase luminescence data normalized to total protein.
