# Supplementary material
Source: PubMed Central journal article supplement (PMC10517330)
Supplement: Supp_FigS12.pdf [file Supp_FigS12.pdf]

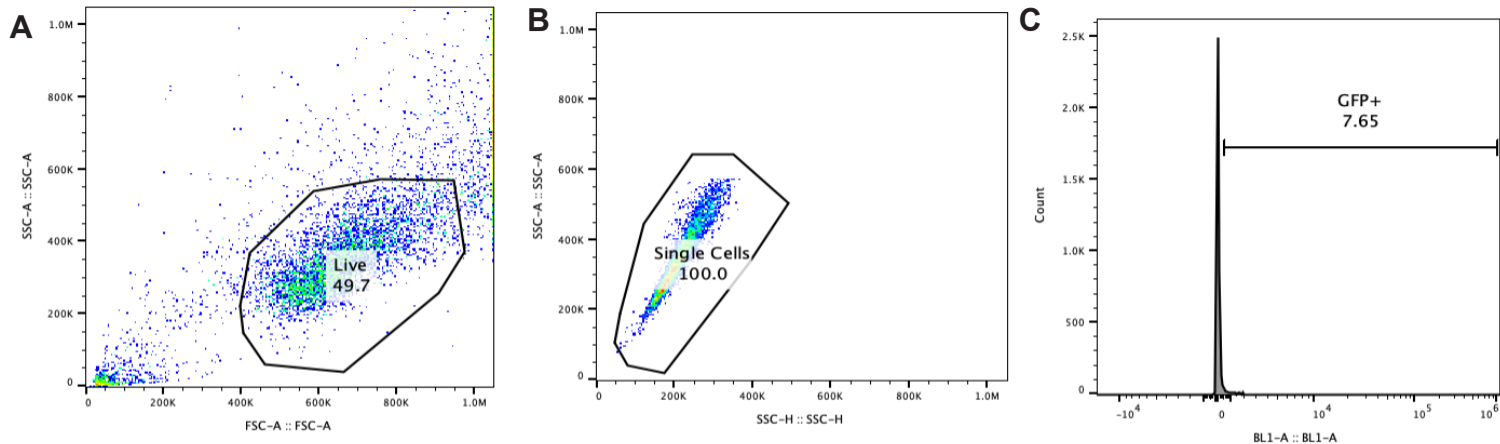

**Supplementary Figure 12:** Flow cytometry data from infection of  $2E+4$  vg/cell of AAV2 containing +ZF-FKBP\_GFP and varying concentrations of CEM87 into HCT116 cells. Gating example is for a single biological replicate of HCT116 cells infected with AAV2 +ZF-FKBP\_GFP and treated with 1000 nM of CEM87. A. FSC and SSC gating for live cells, B. SCC gating for single cells, and C. BL1 laser gating detecting GFP positive cells.
