# Supplementary material
Source: PubMed Central journal article supplement (PMC10517330)
Supplement: Supp_FigS13.pdf [file Supp_FigS13.pdf]

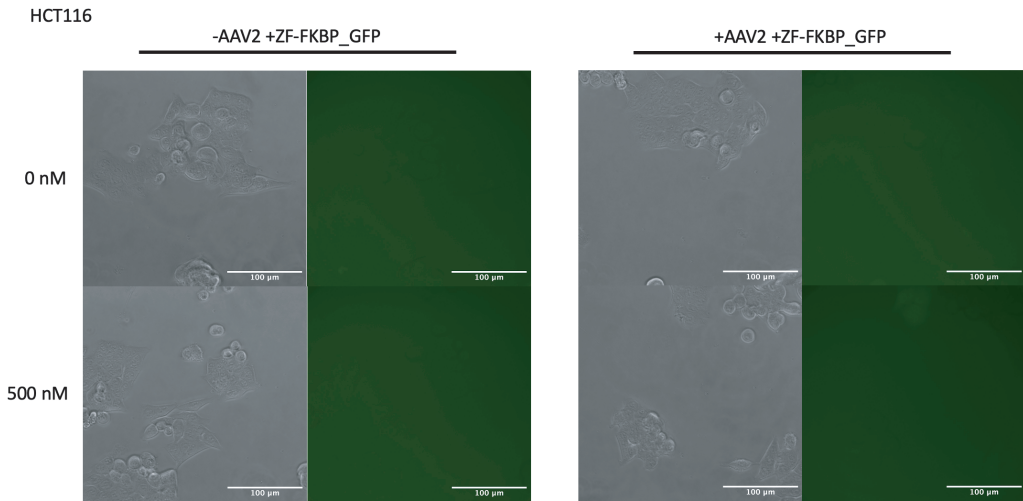

40X Magnification

**Supplementary Figure 13:** Cell images of HCT116 cells either infected with  $2E+4$  vg/cell of AAV2 containing +ZF-FKBP\_GFP or not infected with AAV2 and treated with either 0 nM or 500 nM of CEM87.
