# Supplementary material
Source: PubMed Central journal article supplement (PMC10517330)
Supplement: Supp_FigS15.pdf [file Supp_FigS15.pdf]

U2-OS

-AAV2 +ZF-FKBP\_GFP

+AAV2 +ZF-FKBP\_GFP

0 nM

500 nM

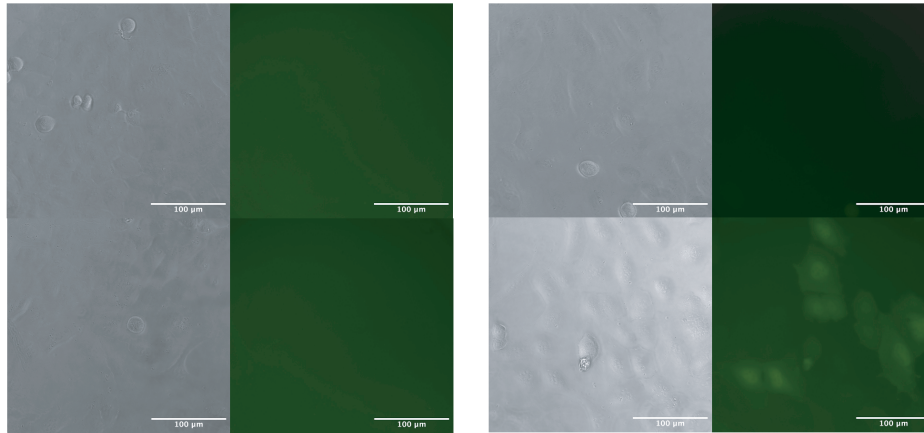

40X Magnification

**Supplementary Figure 15:** Cell images of U2-OS cells either infected with 2E+4 vg/cell of AAV2 containing +ZF-FKBP\_GFP or not infected with AAV2 and treated with either 0 nM or 500 nM of CEM87.
