# Supplementary material
Source: PubMed Central journal article supplement (PMC10517330)
Supplement: Supp_FigS17.pdf [file Supp_FigS17.pdf]

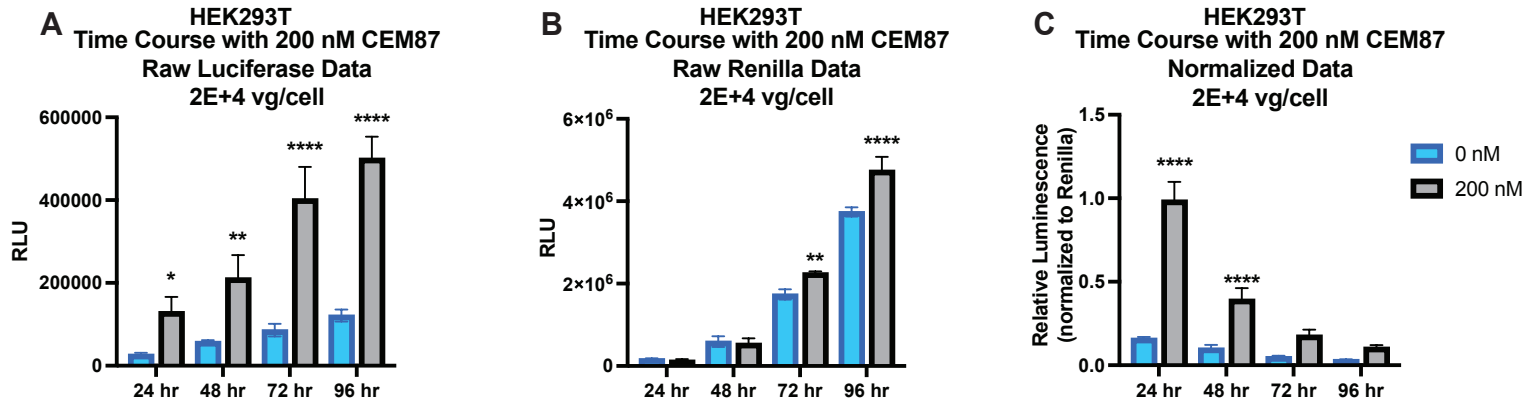

**Supplementary Figure 17:** Data from infection of 2E+4 vg/cell of AAV2 containing +ZF-FKBP and CEM87 into HEK293T-Renilla cells. A. Raw firefly luciferase data, B. Raw renilla luciferase data, and C. Relative firefly luciferase luminescence data normalized to renilla luciferase data.
