# Supplementary material
Source: PubMed Central journal article supplement (PMC10517330)
Supplement: Supp_FigS18.pdf [file Supp_FigS18.pdf]

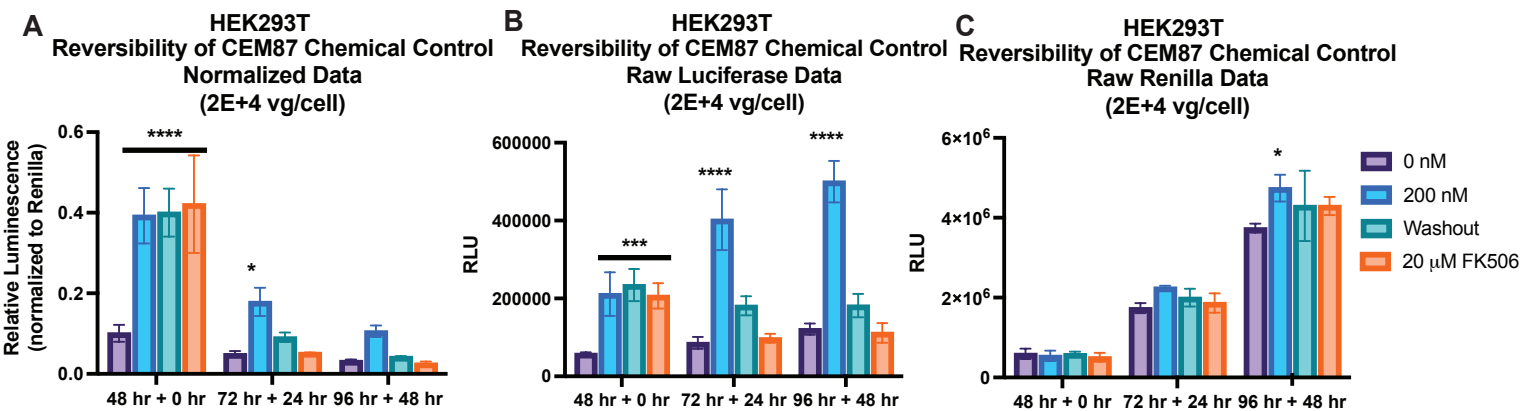

**Supplementary Figure 18:** Data from infection of 2E+4 vg/cell of AAV2 containing +ZF-FKBP into HEK293T EF1 $\alpha$ -Renilla cells. Cells were treated with CEM87 for 48 hours and then washed out or competed away with FK506. A. Raw firefly luciferase data, B. Raw renilla luciferase data, and C. Relative firefly luciferase luminescence data normalized to renilla luciferase data.
