# Supplementary material
Source: PubMed Central journal article supplement (PMC10517330)
Supplement: Supp_FigS19.pdf [file Supp_FigS19.pdf]

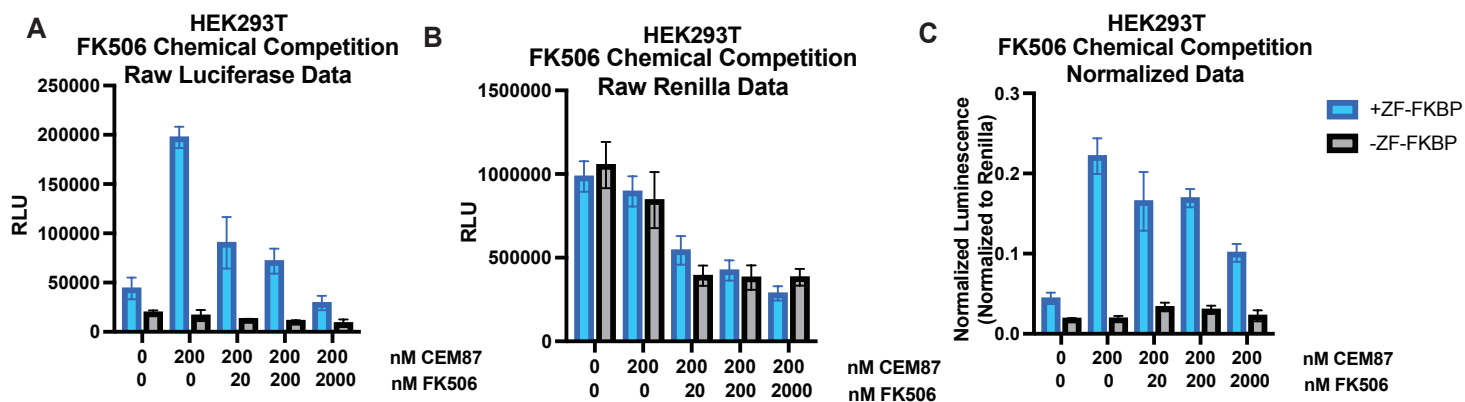

**Supplementary Figure 19:** Data from infection of  $2E+4$  vg/cell of AAV2 containing +ZF-FKBP or -ZF-FKBP into HEK293T EF1 $\alpha$ -Renilla cells. Cells were treated with CEM87 and various concentrations of FK506. A. Raw firefly luciferase data, B. Raw renilla luciferase data, and C. Relative firefly luciferase luminescence data normalized to renilla luciferase data.
